# Supplementary material for: Robust and annotation-free analysis of alternative splicing across diverse cell types in mice
Source: eLife journal article supplement (doi:10.7554/elife.73520), 2022-02-28

# Pdpr1

Vip - batches R8S4-180530 & R8S4-180524

High Read Depth

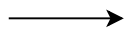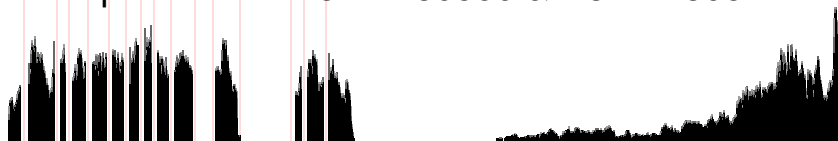

Vip - other batches

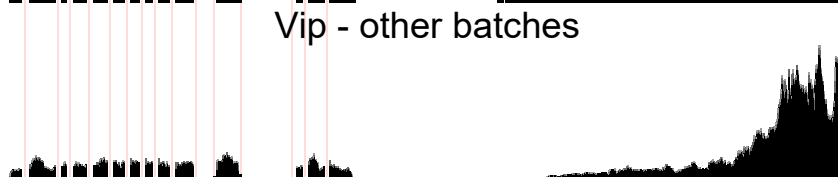

Sst - batches R8S4-180530 & R8S4-180524

High Read Depth

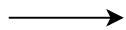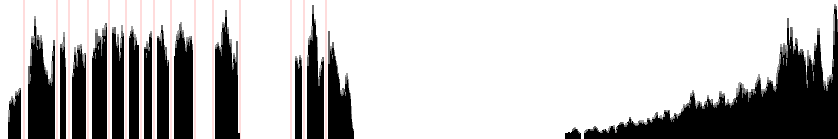

Sst - other batches

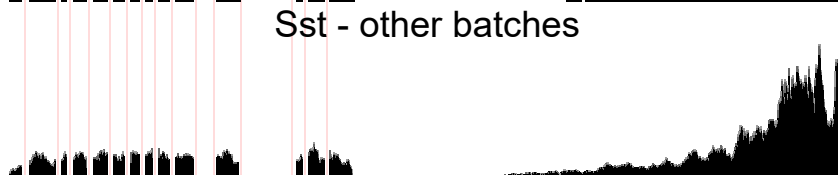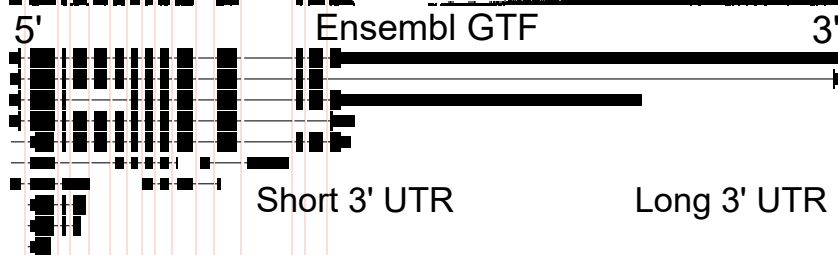

Low Read Depth

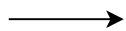

Supplement: supp [file elife-73520-supp-v1.zip]
