# Supplementary material for: Robust and annotation-free analysis of alternative splicing across diverse cell types in mice
Source: eLife journal article supplement (doi:10.7554/elife.73520), 2022-02-28

(a) Quantification runtime

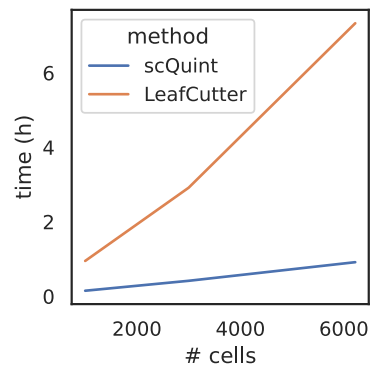

(b) Differential splicing runtime and memory usage

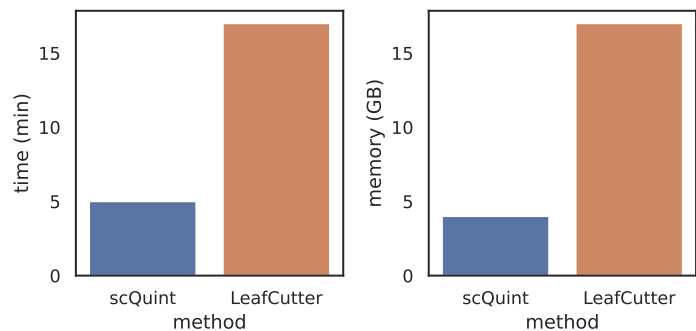

(c) Differential splicing  $p$ -value calibration

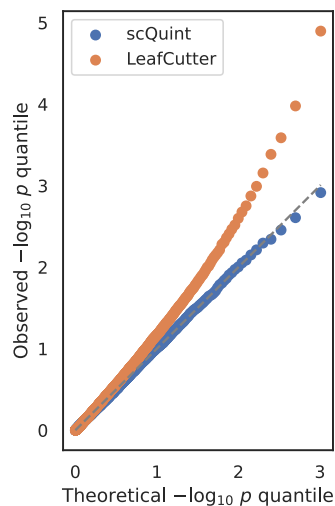

Supplement: supp [file elife-73520-supp-v1.zip]
