# Supplementary material for: Robust and annotation-free analysis of alternative splicing across diverse cell types in mice
Source: eLife journal article supplement (doi:10.7554/elife.73520), 2022-02-28

(a) *Akr1r1* - relatively uniform coverage

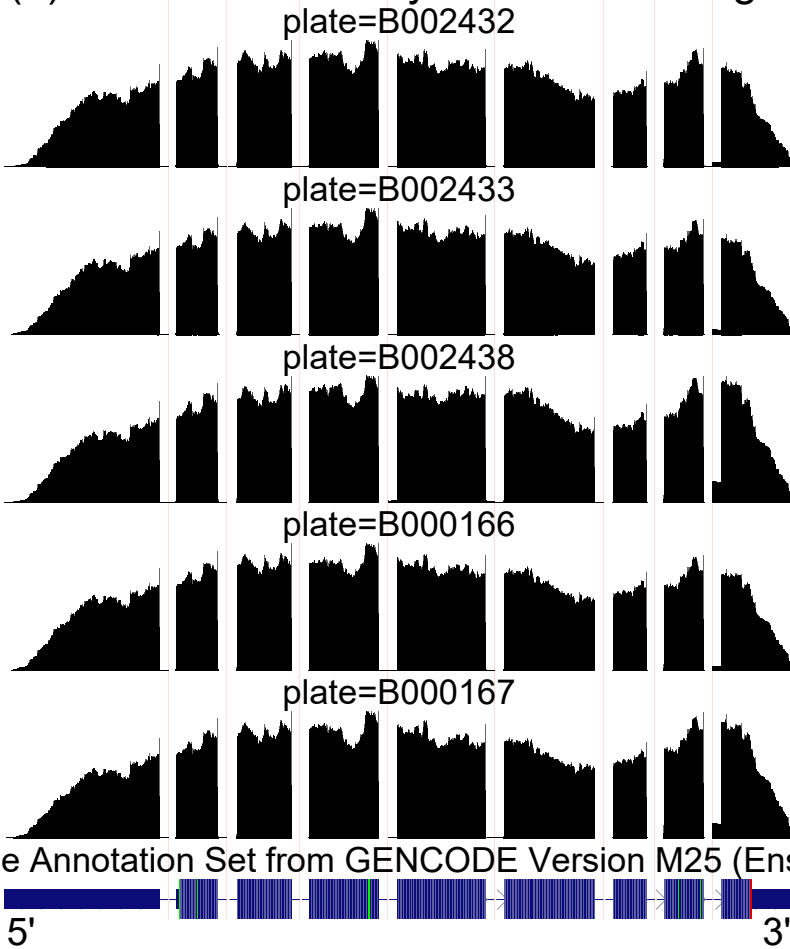

(b) *Ctnbb1* - gradual drop in coverage

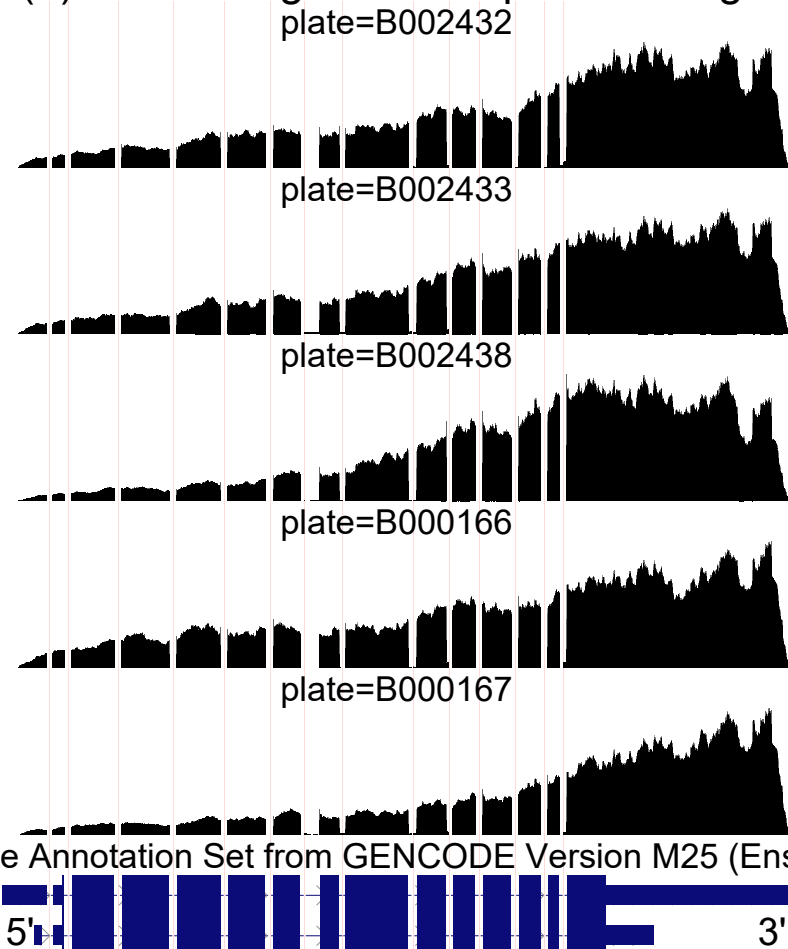

(c) *Pdpr* - sudden drop in coverage

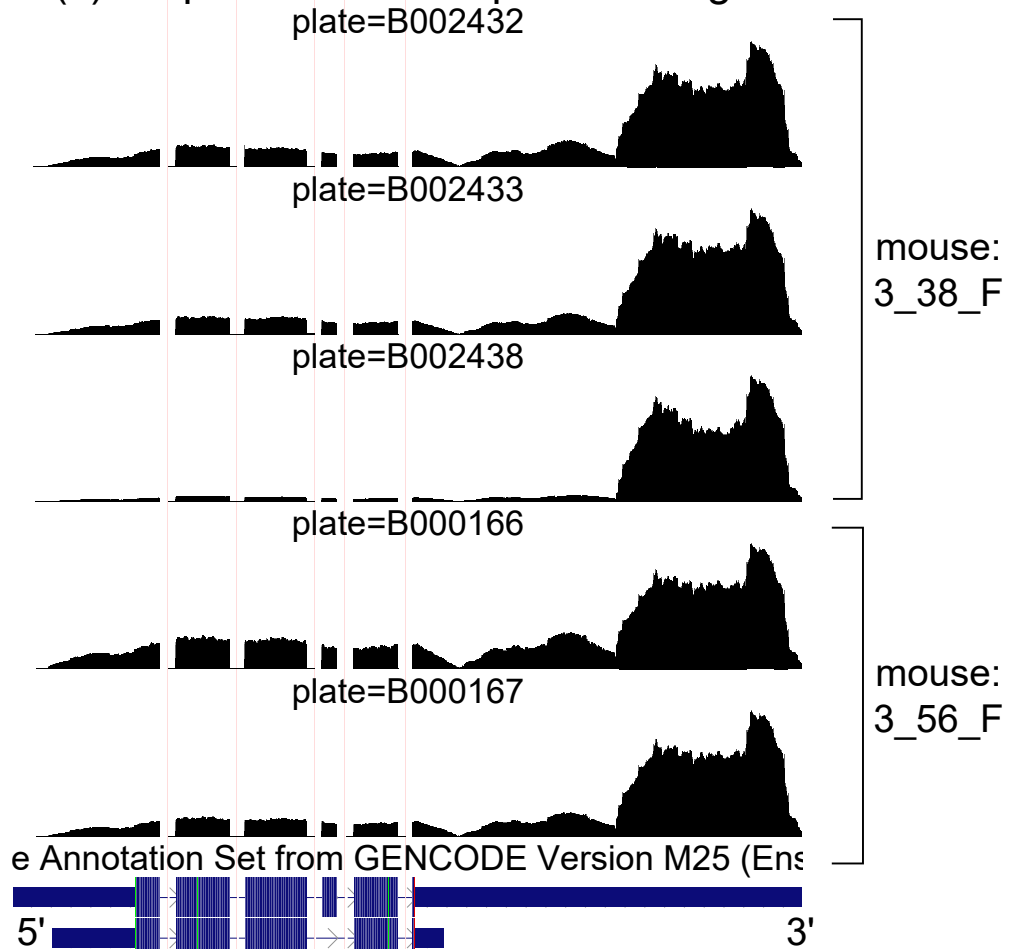

Supplement: supp [file elife-73520-supp-v1.zip]
