# Supplementary material for: Robust and annotation-free analysis of alternative splicing across diverse cell types in mice
Source: eLife journal article supplement (doi:10.7554/elife.73520), 2022-02-28
Supplement: supp [file elife-73520-supp-v1.zip]

Splicing

Splicing (shuffled)

Cell type

- L5 IT
- L2/3 IT
- L6 IT
- L6 CT
- L6b
- L5/6 NP
- Pvalb
- Sst
- Vip
- Lamp5

UMAP 2

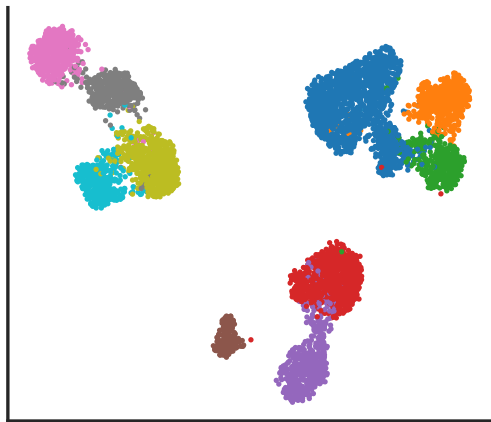

UMAP 1

UMAP 2

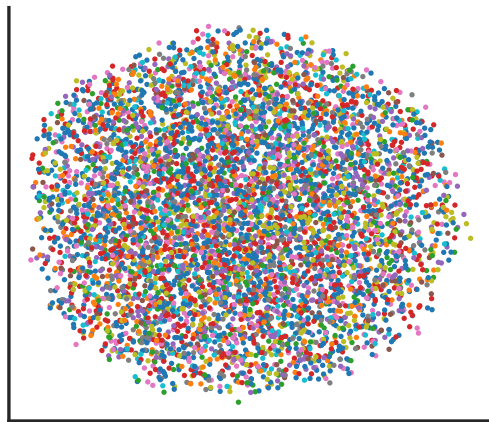

UMAP 1
