# Supplementary figures and images for: Robust and annotation-free analysis of alternative splicing across diverse cell types in mice
Source: eLife journal article supplement (doi:10.7554/elife.73520), 2022-02-28

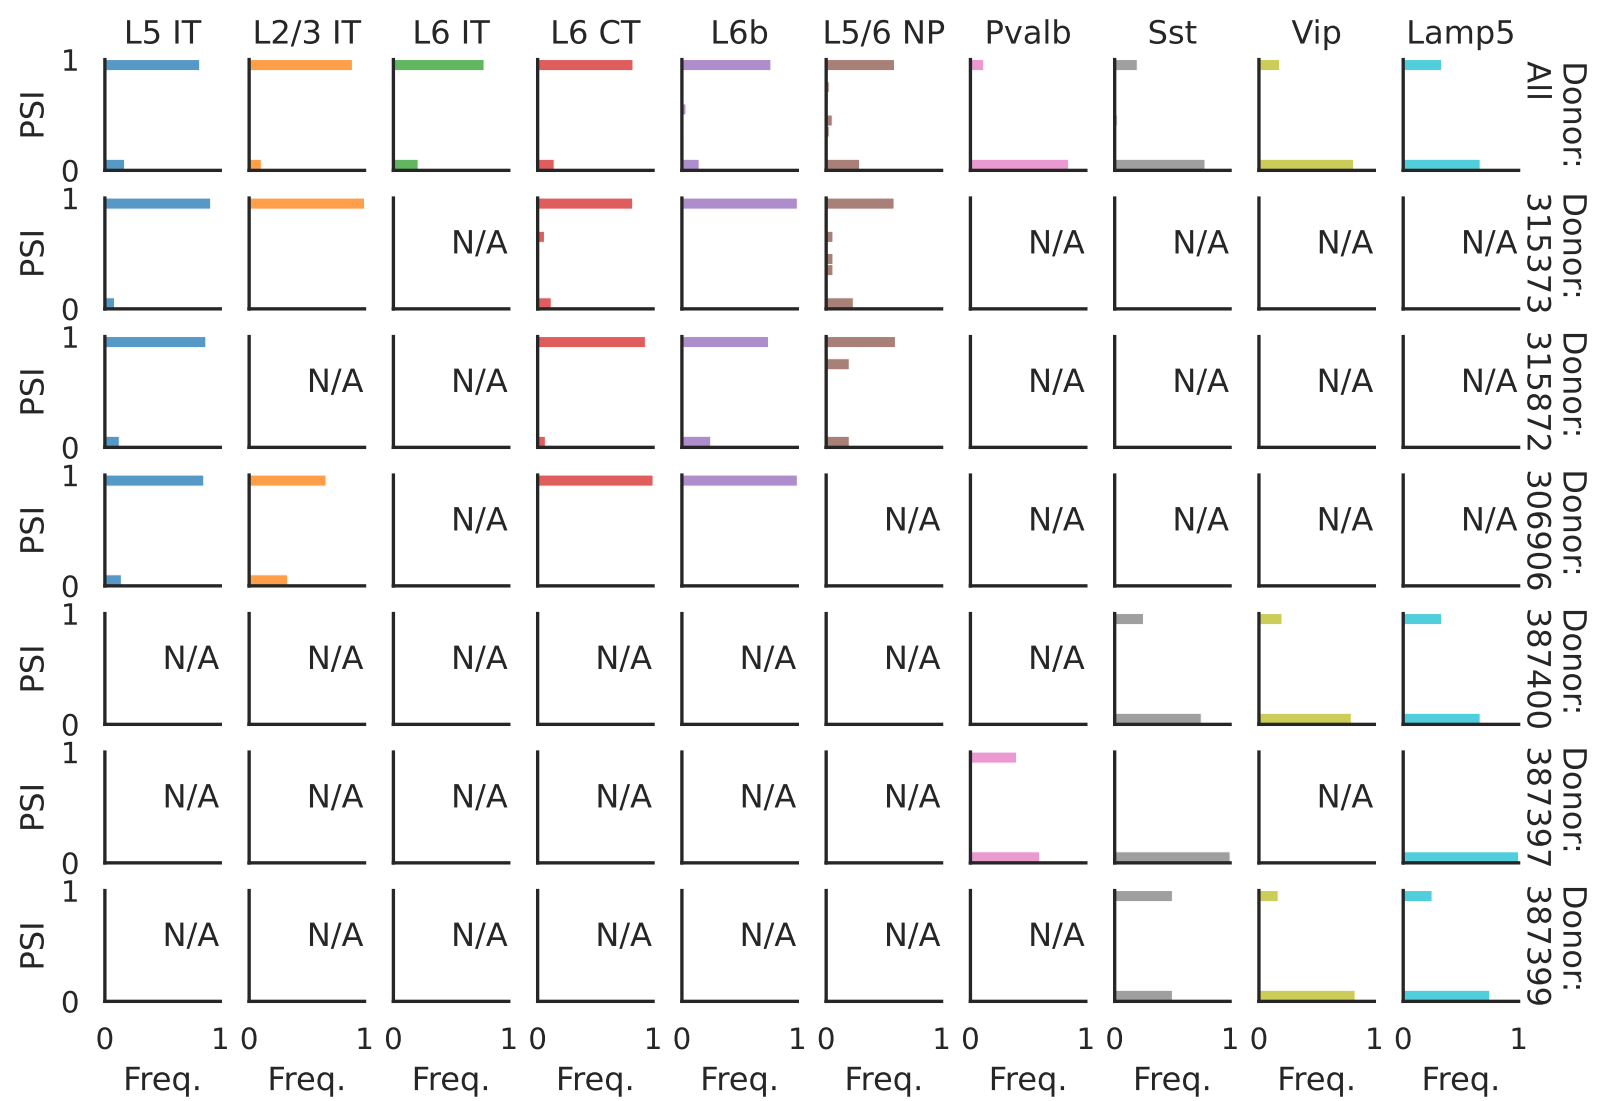

Supplement: supp [file elife-73520-supp-v1.zip]

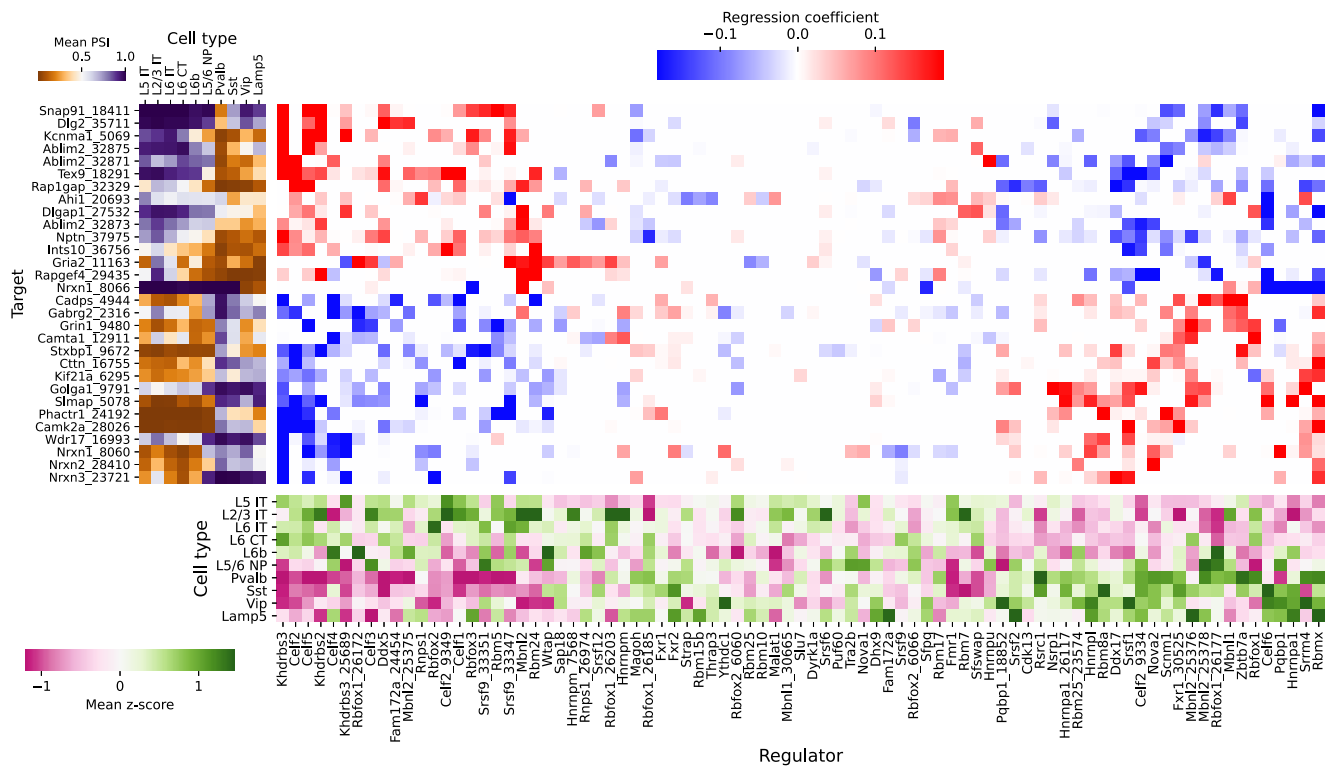

Supplement: supp [file elife-73520-supp-v1.zip]

Mean expression

0.00 0.02 0.04 0.06 0.08 0.10

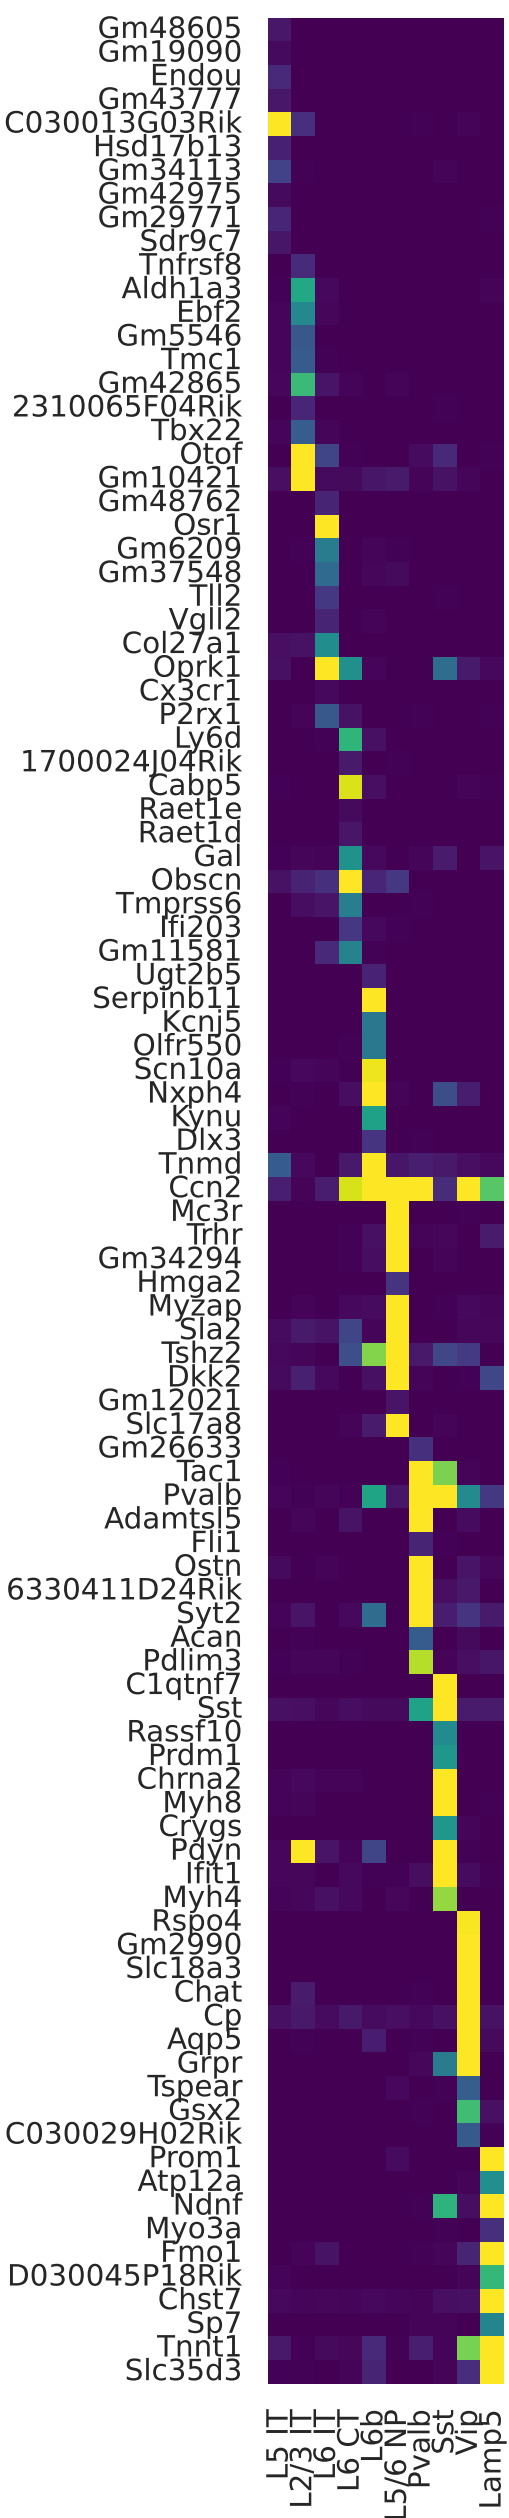

Supplement: supp [file elife-73520-supp-v1.zip]

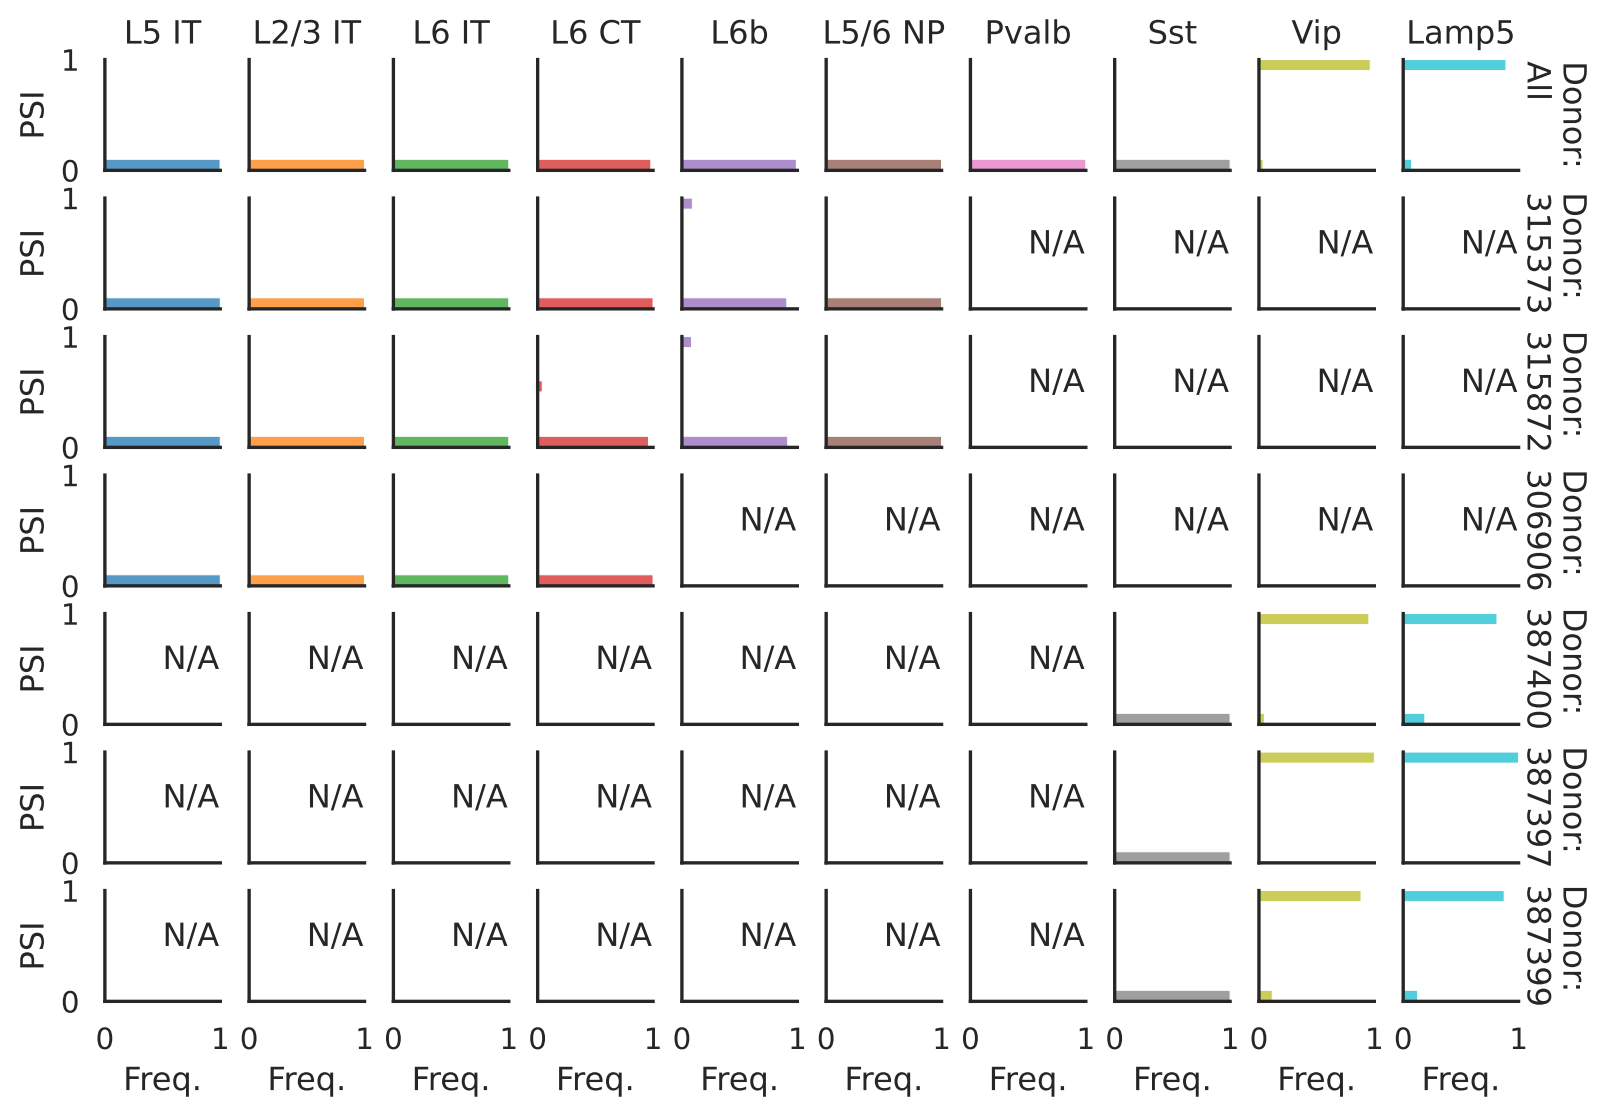

Supplement: supp [file elife-73520-supp-v1.zip]

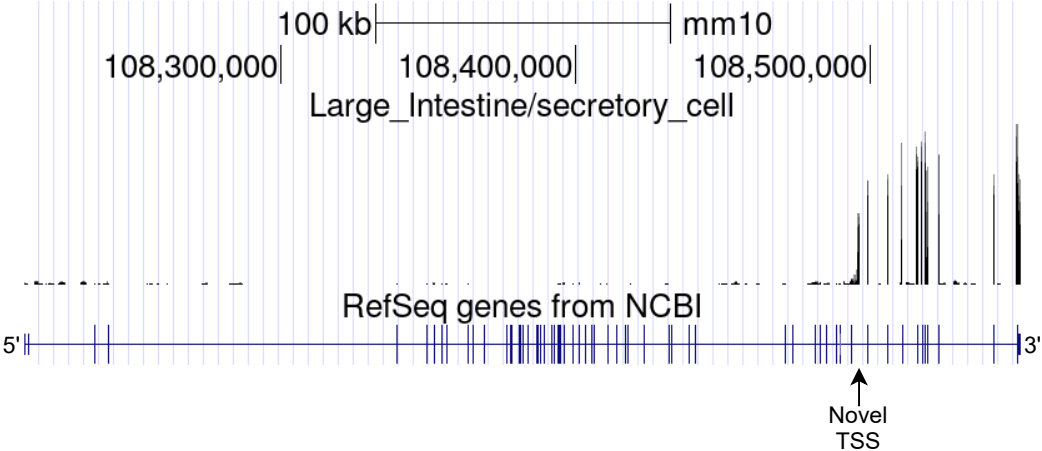

Supplement: supp [file elife-73520-supp-v1.zip]

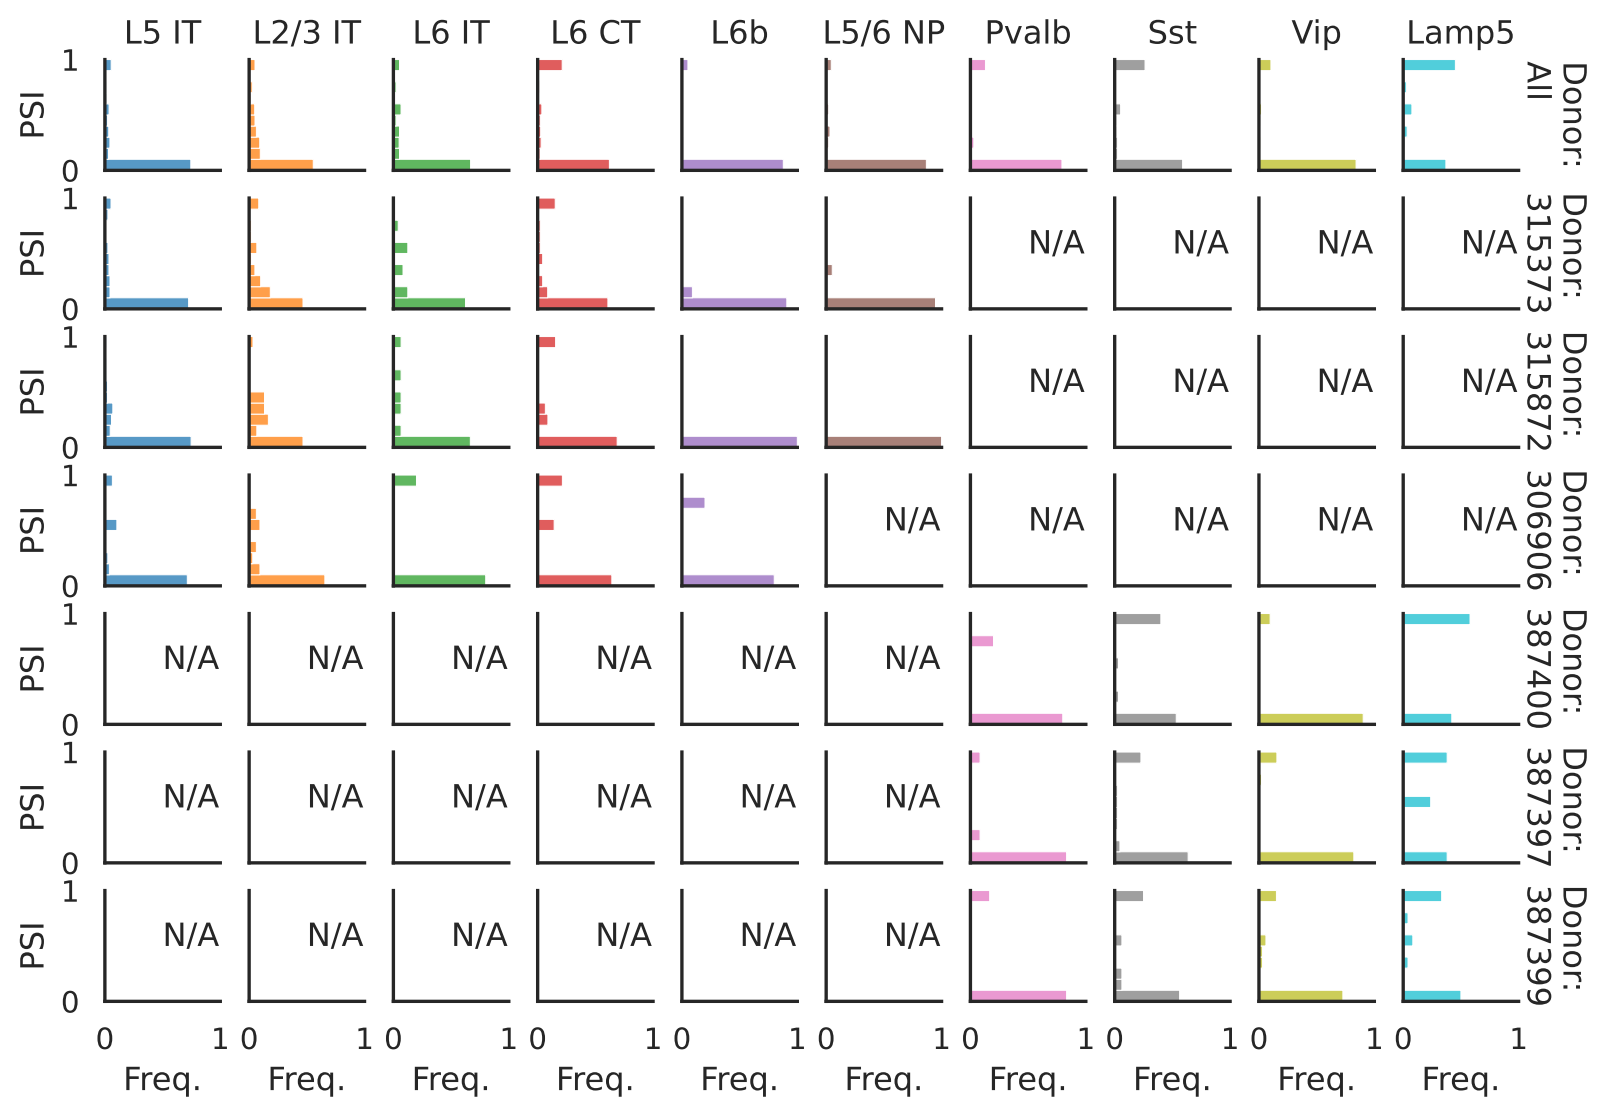

Supplement: supp [file elife-73520-supp-v1.zip]

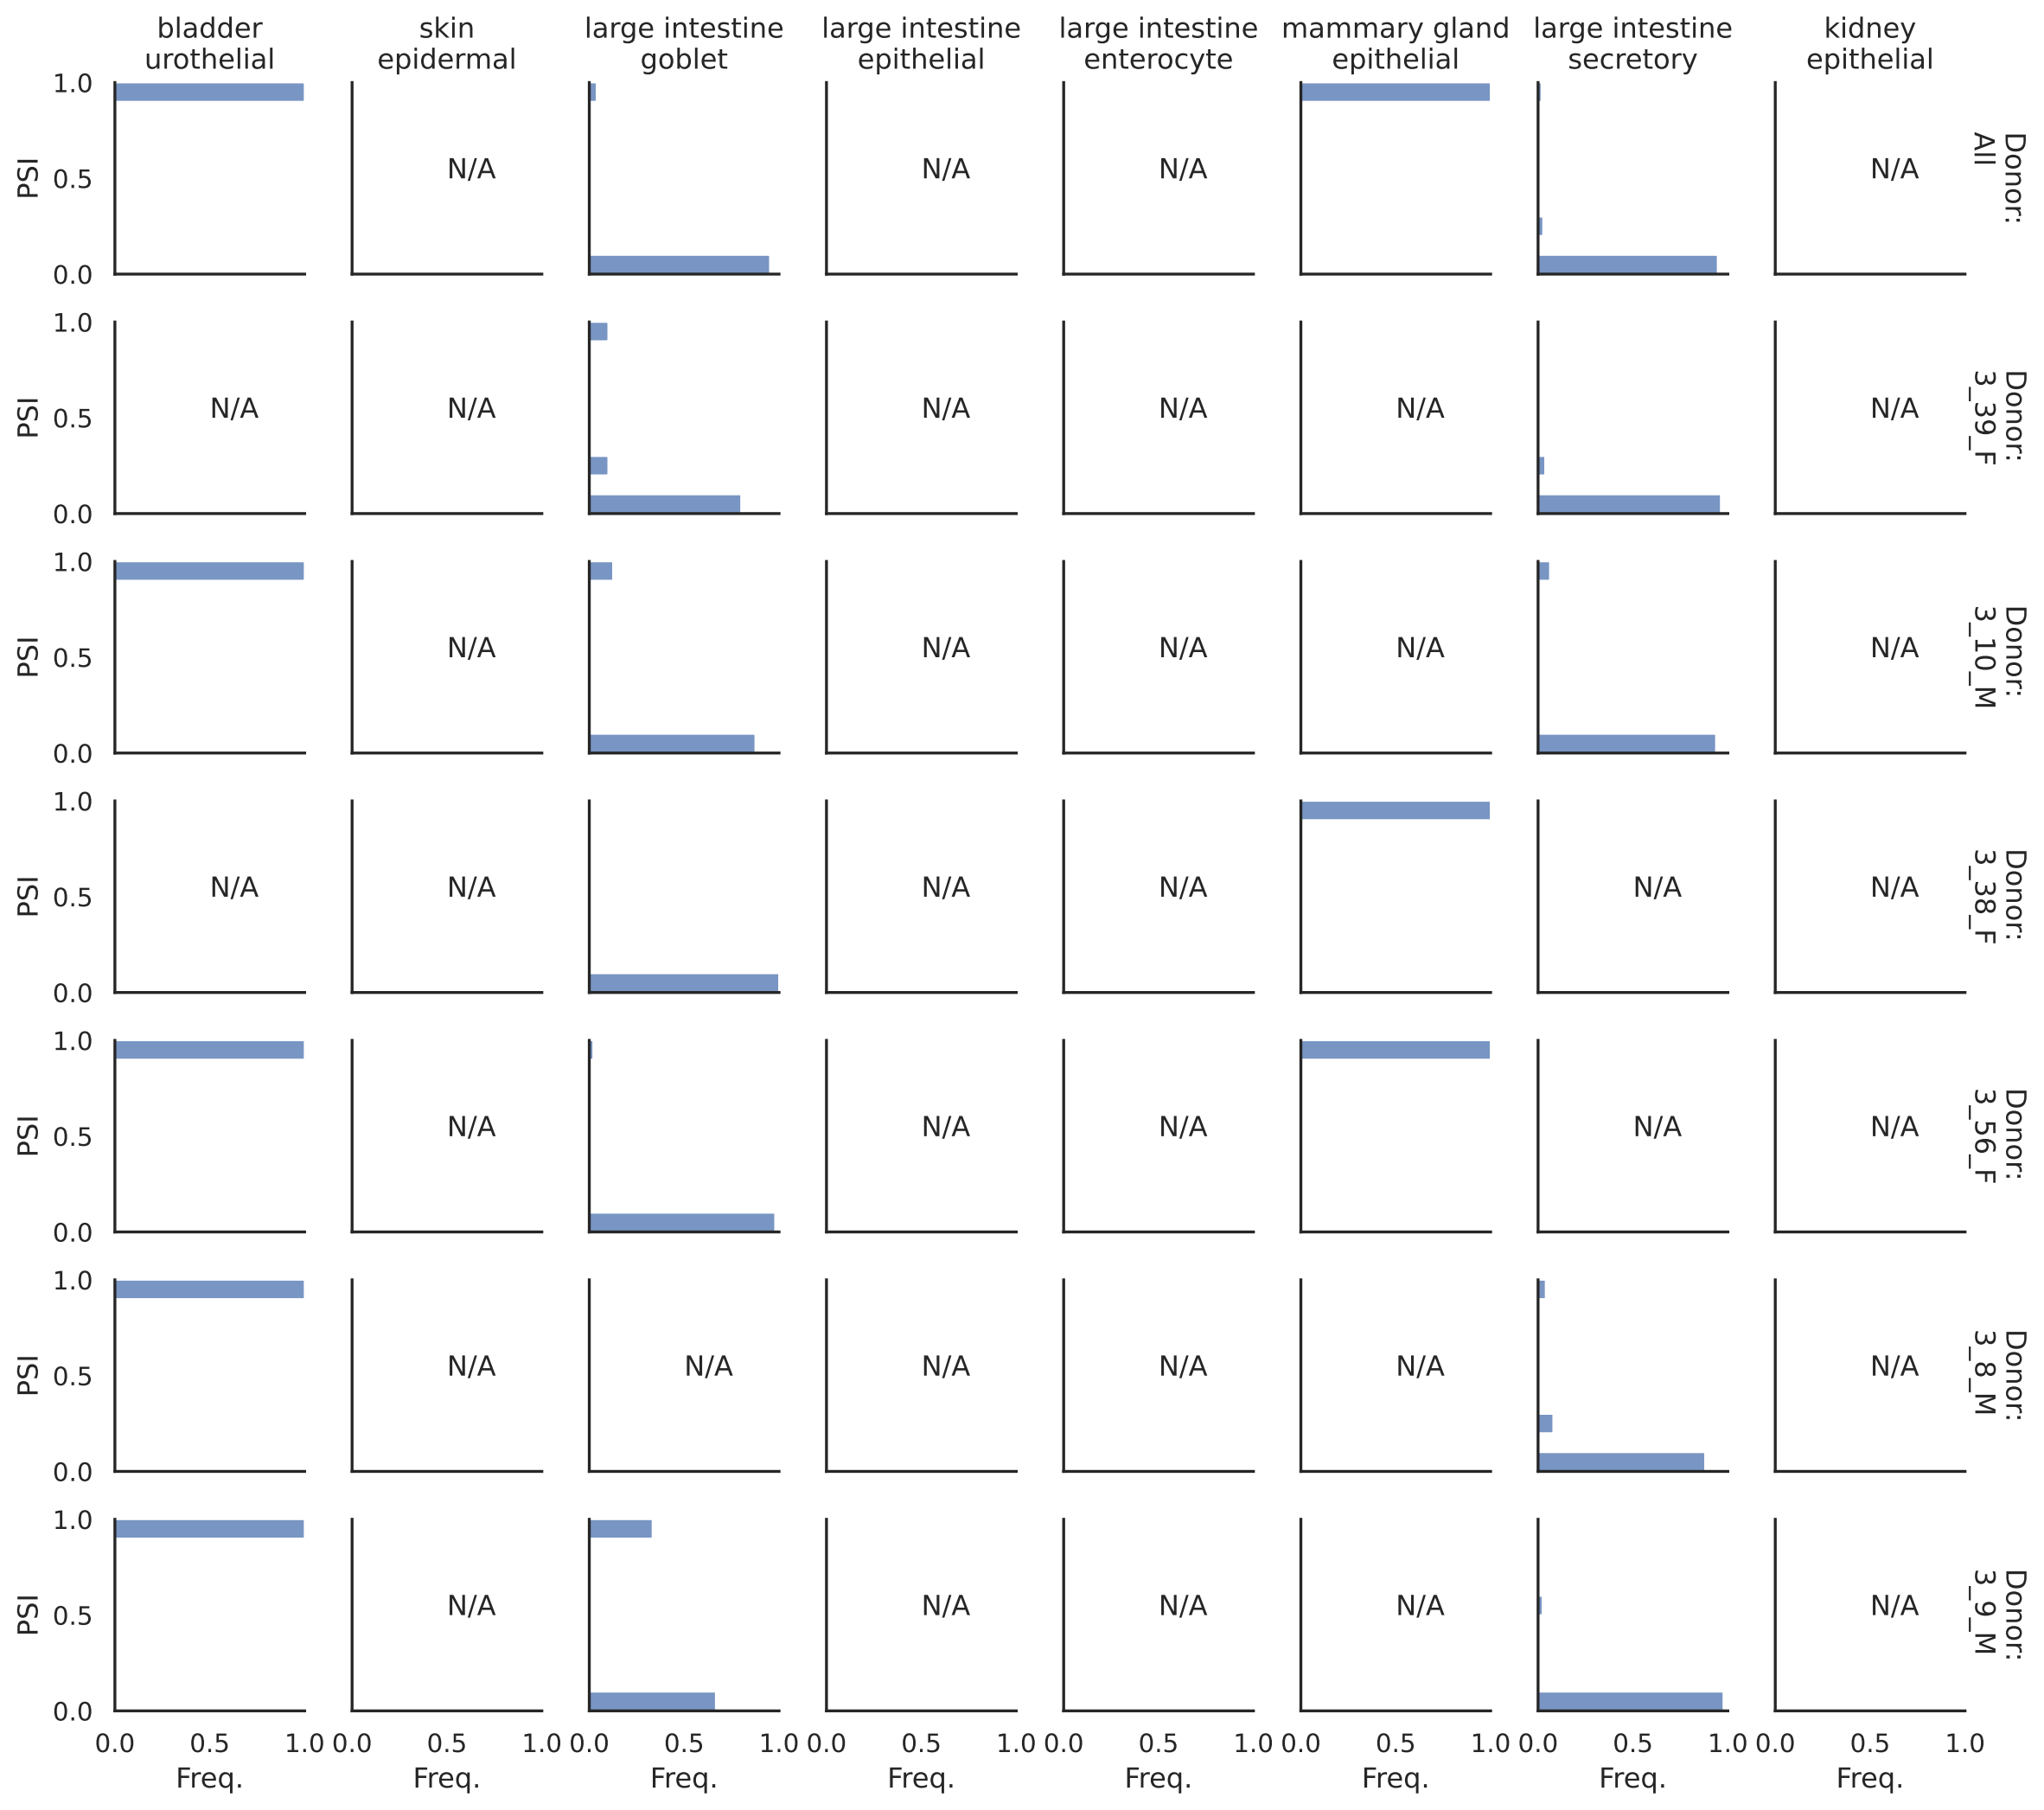

Supplement: supp [file elife-73520-supp-v1.zip]

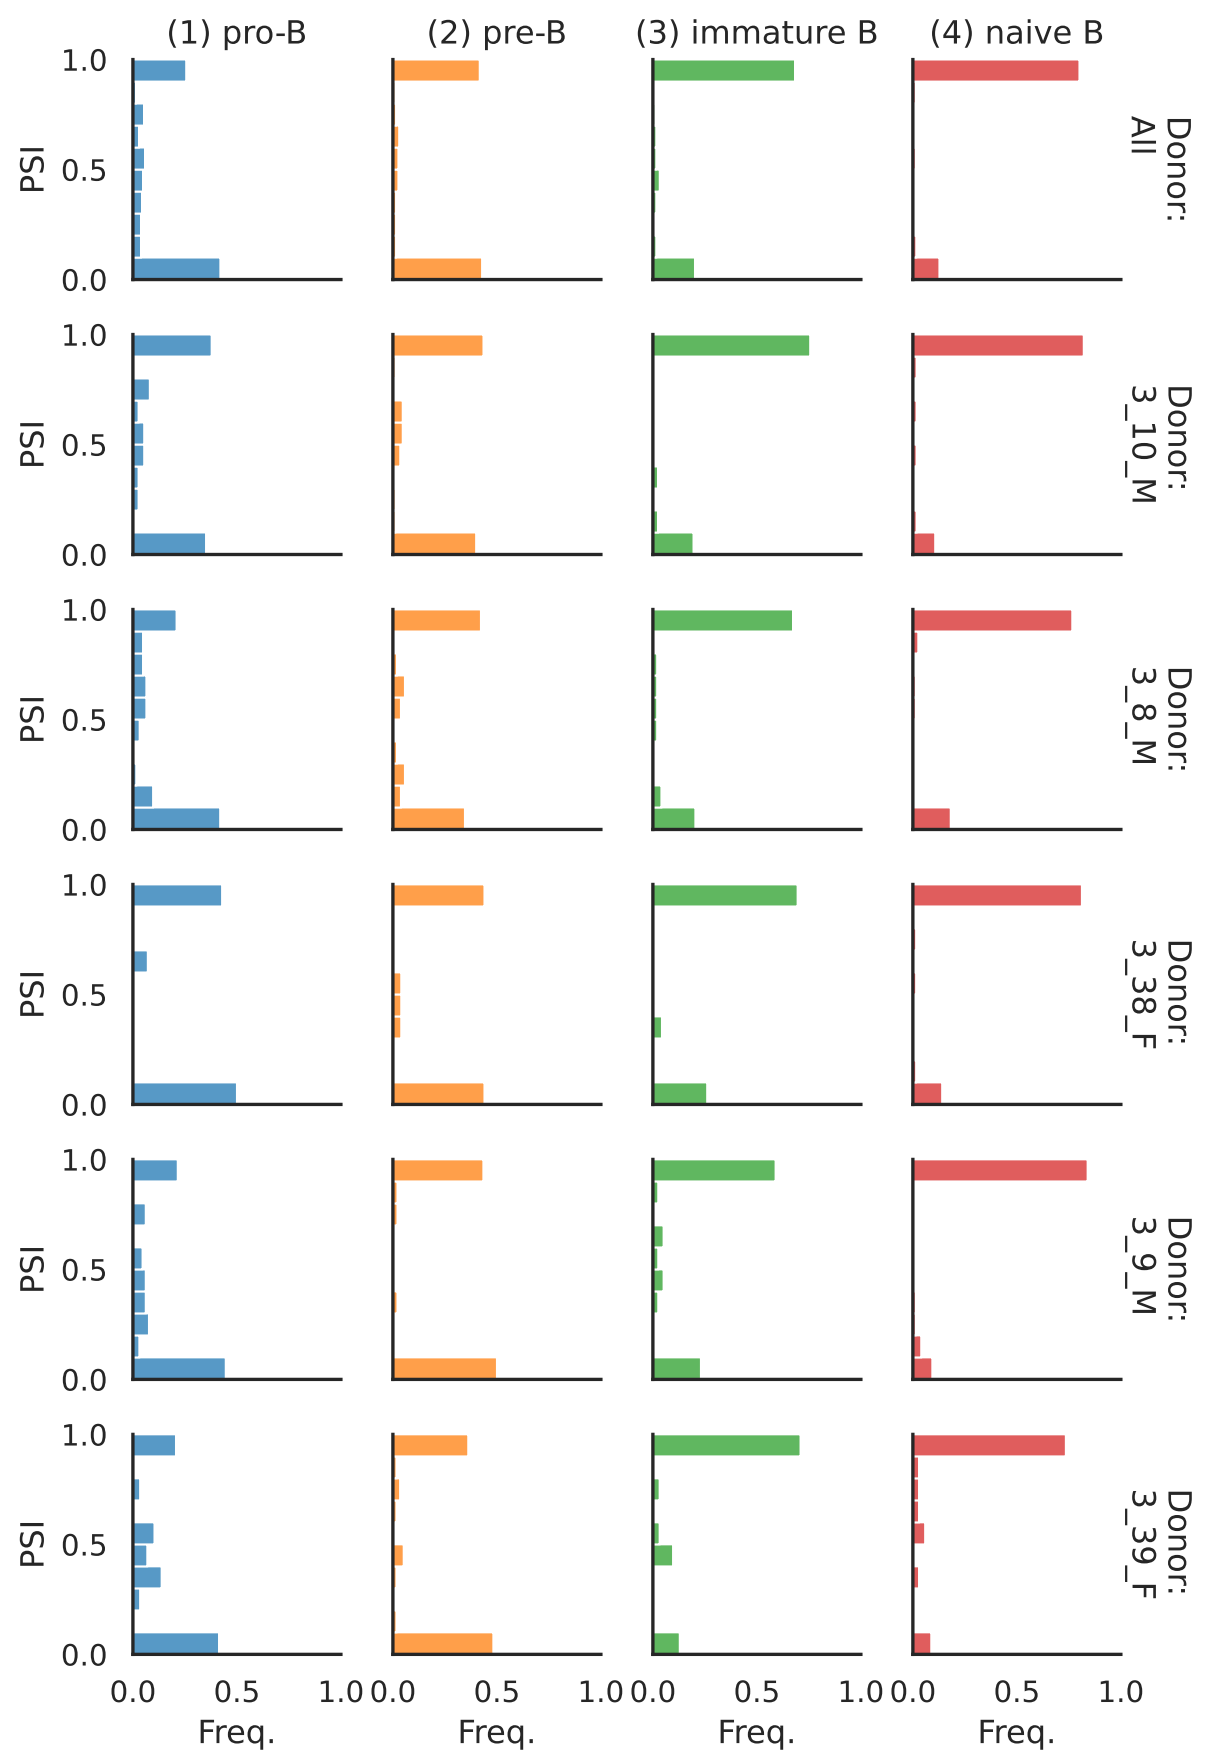

Supplement: supp [file elife-73520-supp-v1.zip]

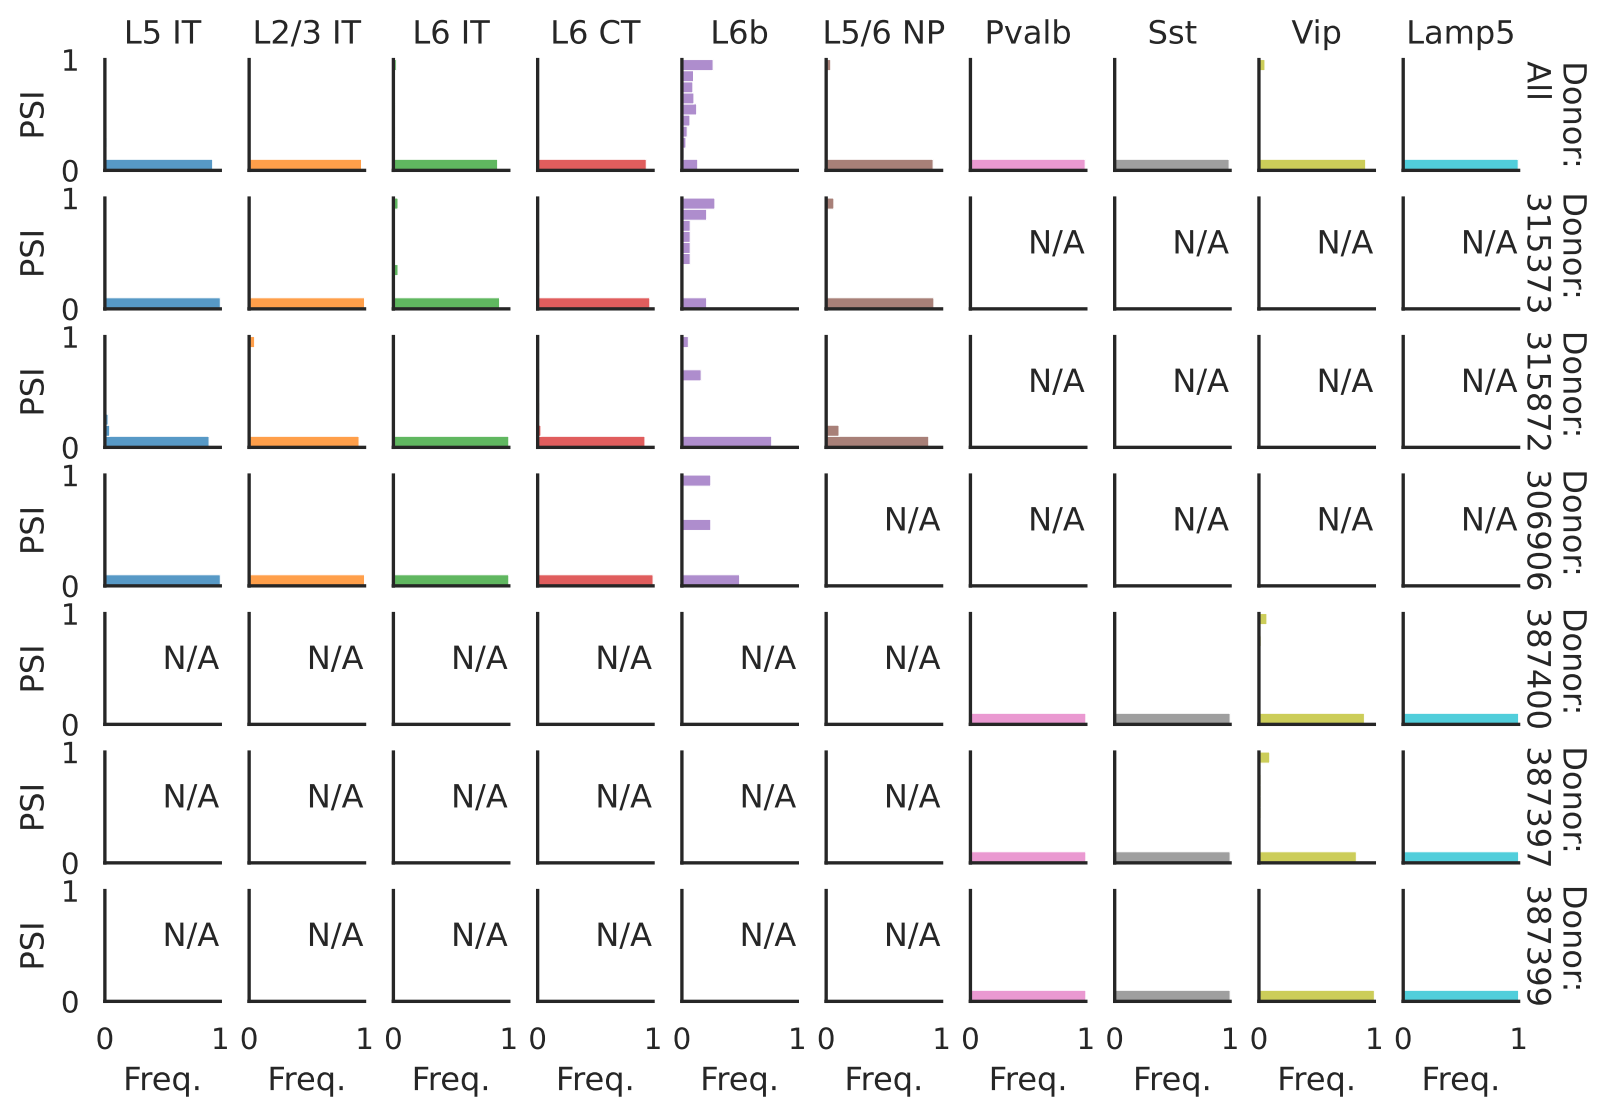

Supplement: supp [file elife-73520-supp-v1.zip]

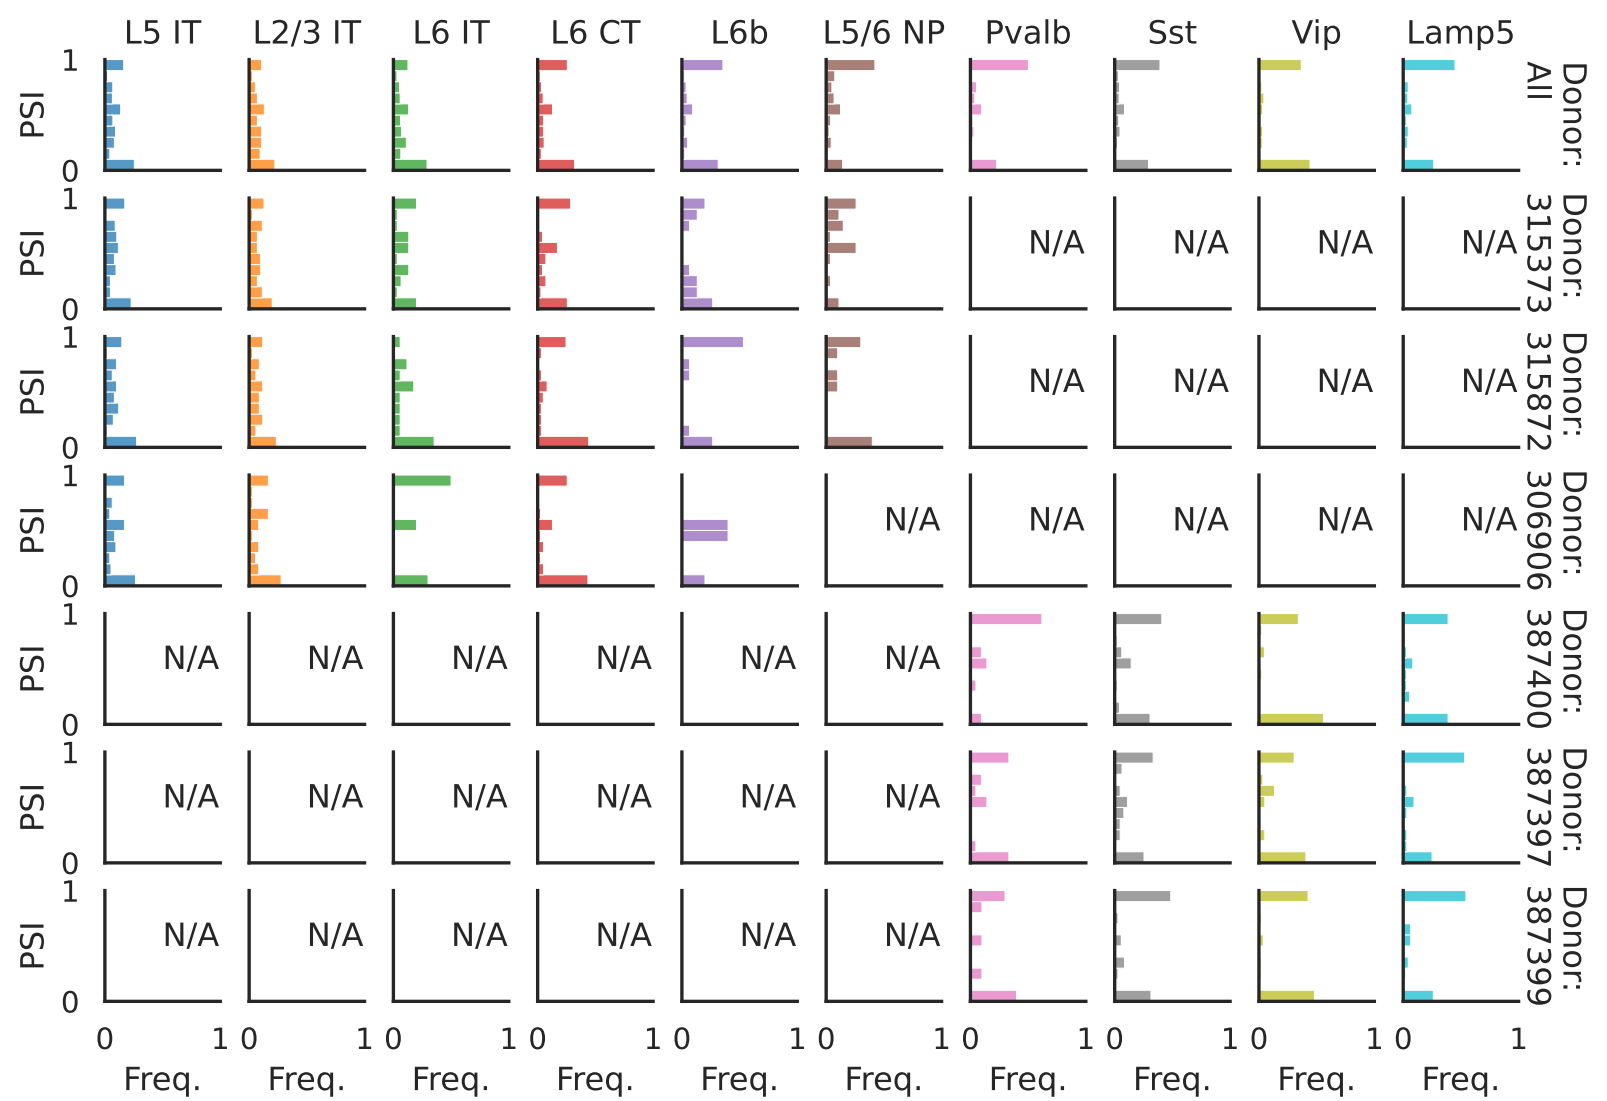

Supplement: supp [file elife-73520-supp-v1.zip]

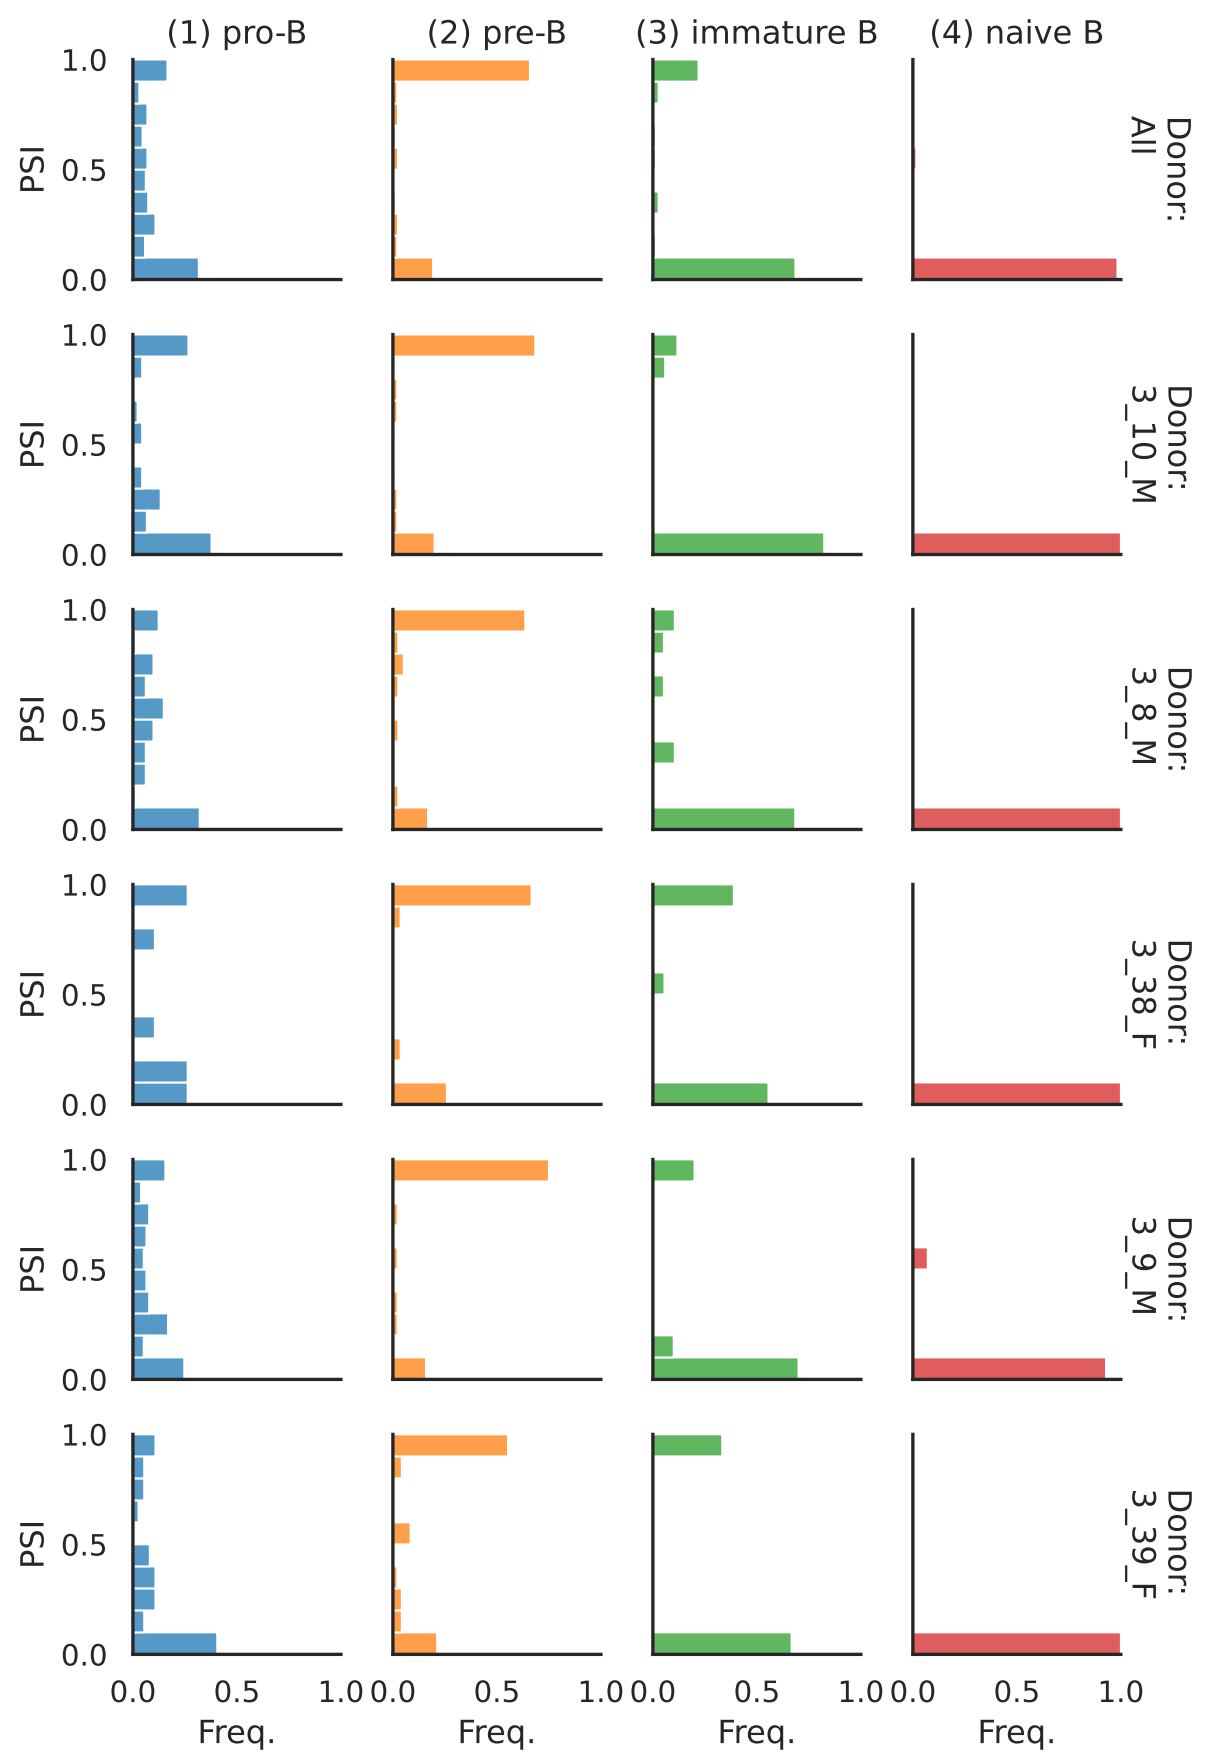

Supplement: supp [file elife-73520-supp-v1.zip]

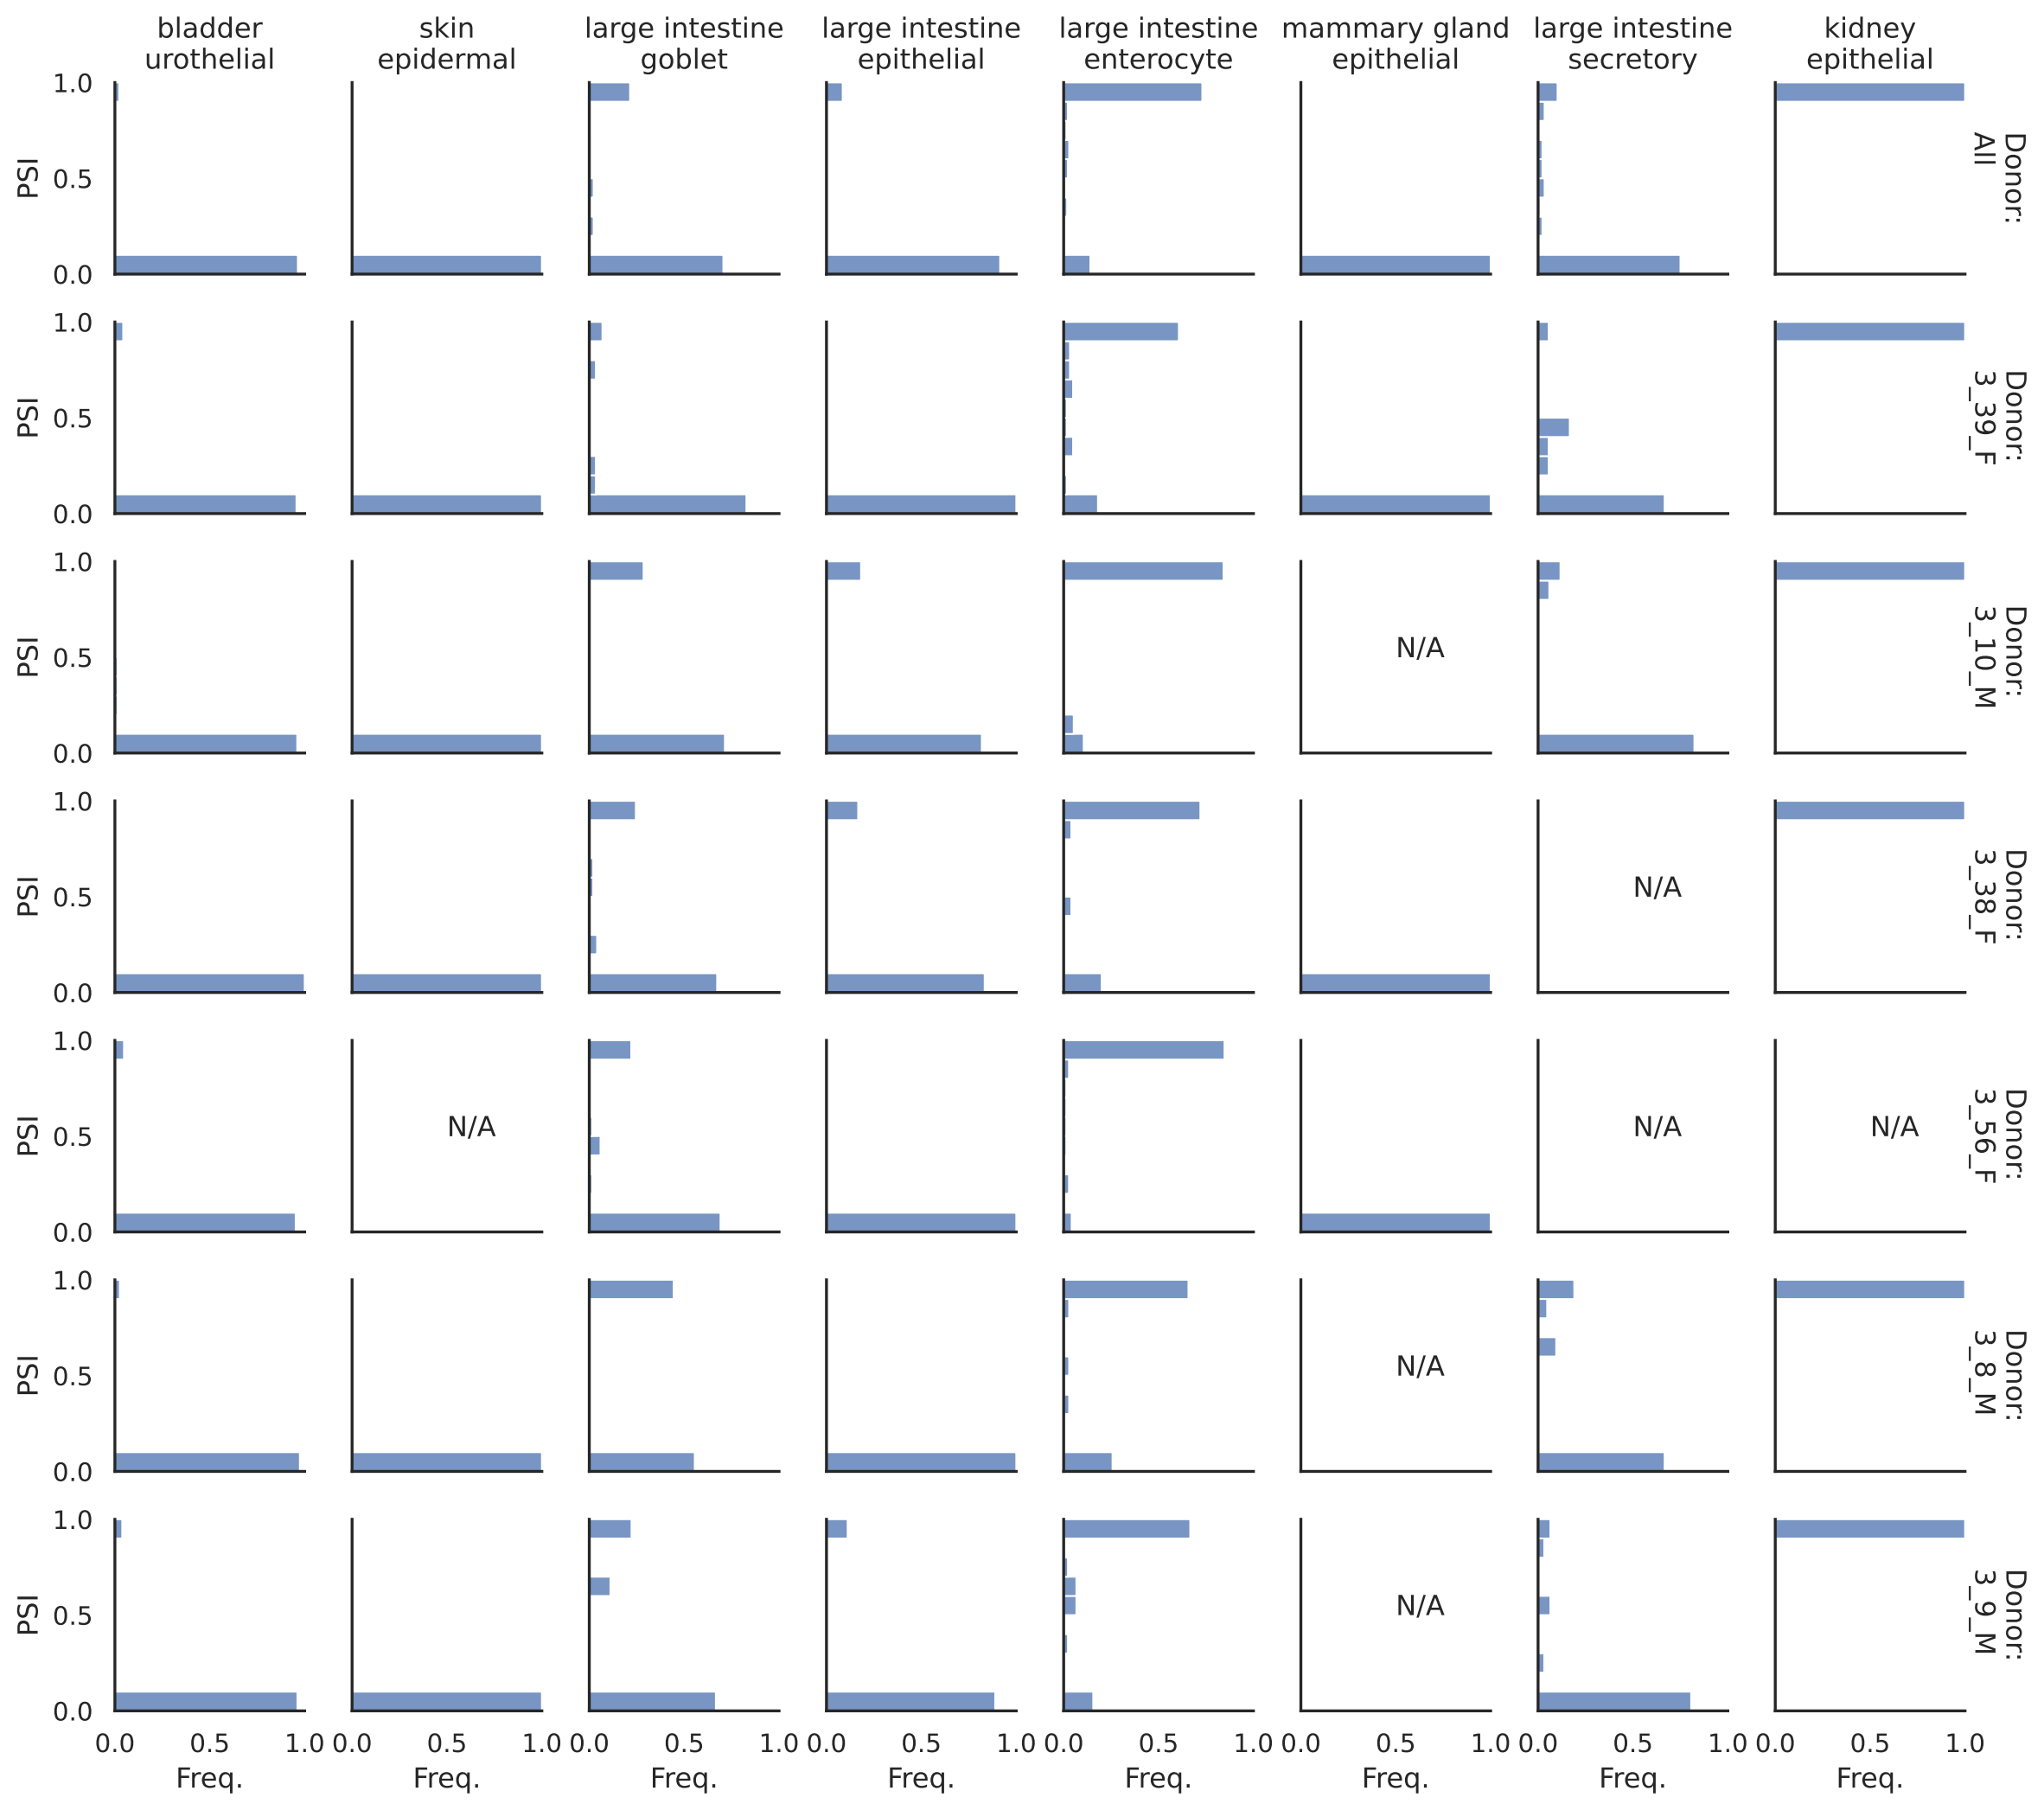

Supplement: supp [file elife-73520-supp-v1.zip]

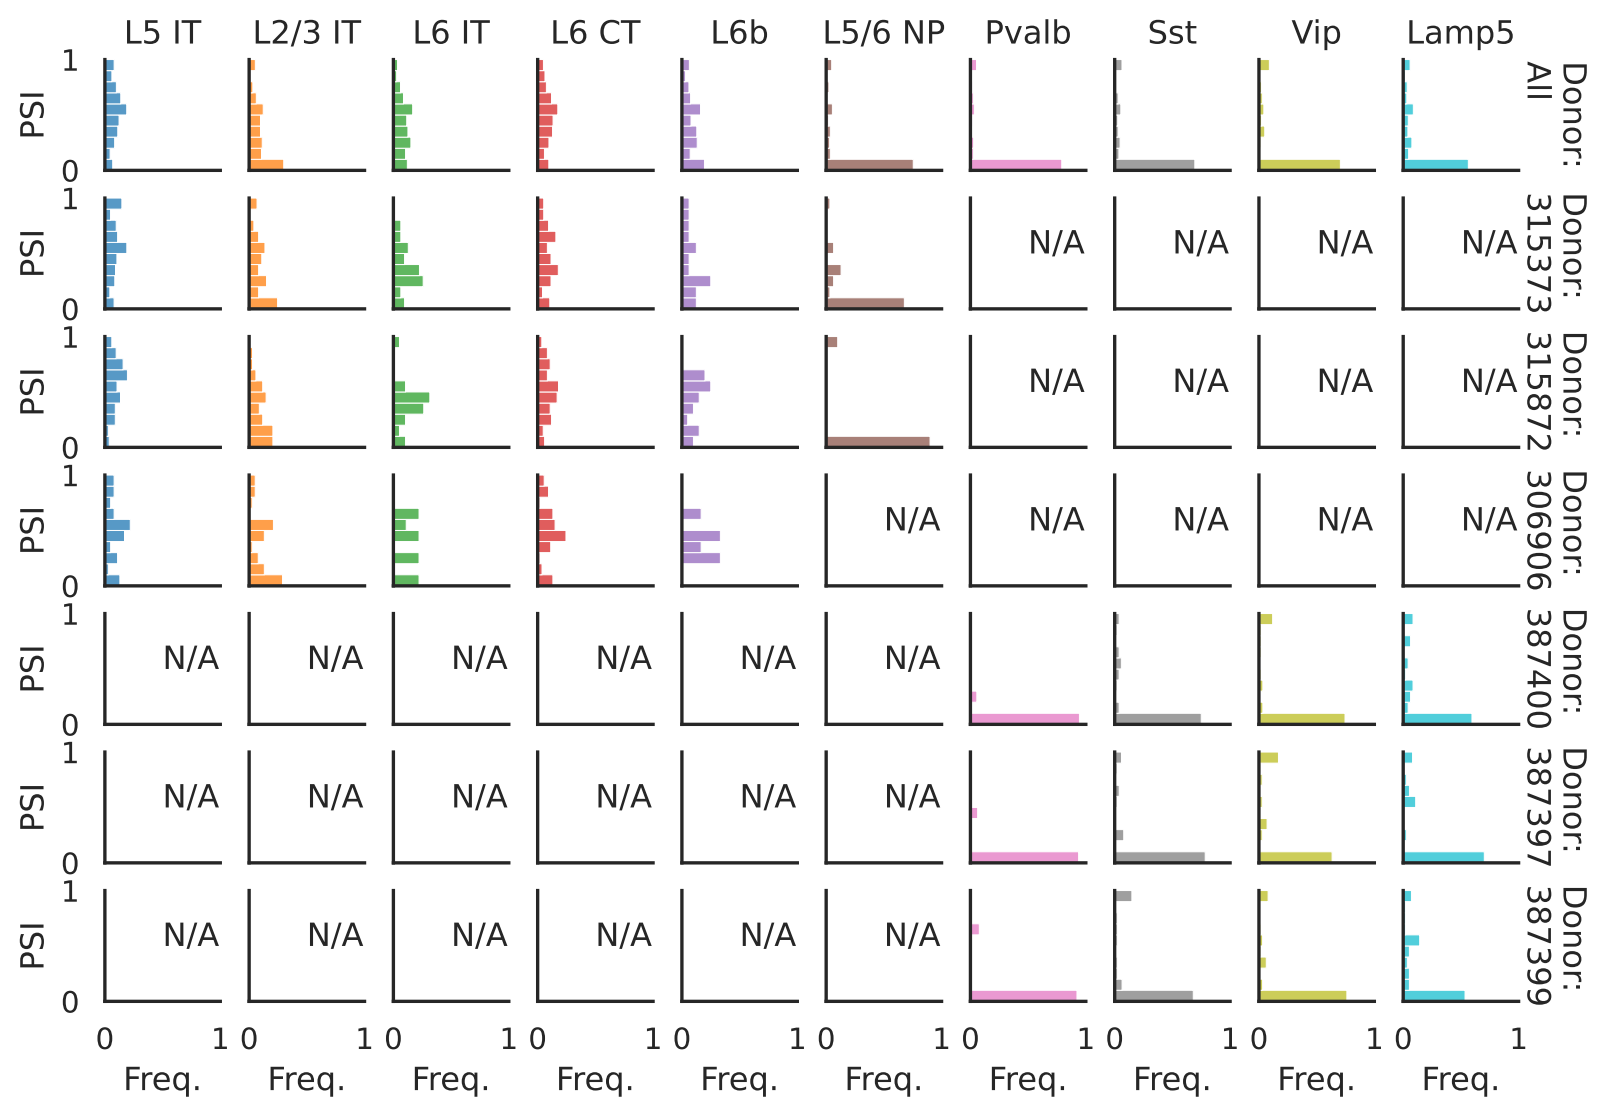

Supplement: supp [file elife-73520-supp-v1.zip]
